# Supplementary material
Source: Springer Nature journal article supplement (https://www.springermedizin.de/resource/supplementary/12947_2007_179_MOESM7_ESM.pdf/9556398)

# A Anterior Leaflet Excursion

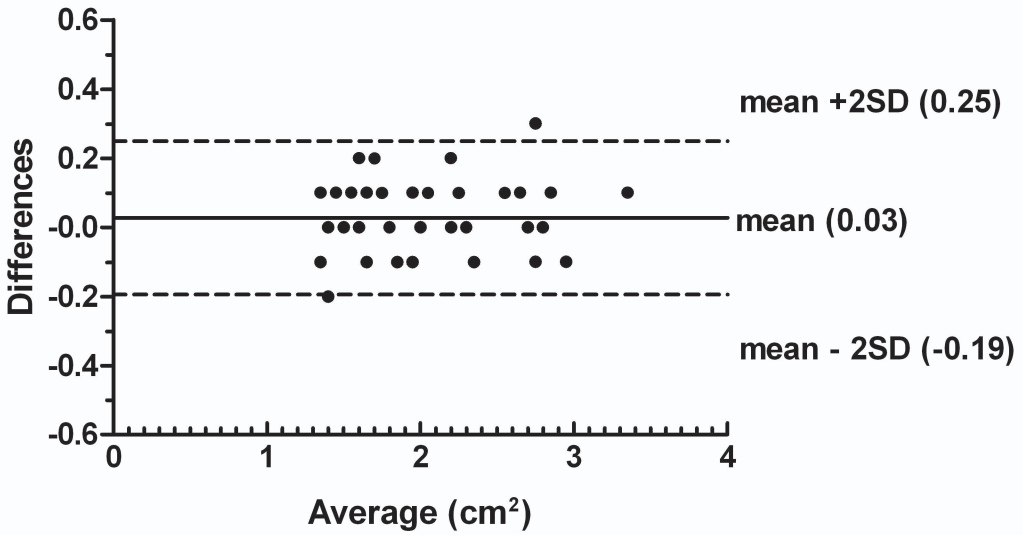

# B Posterior Leaflet Excursion

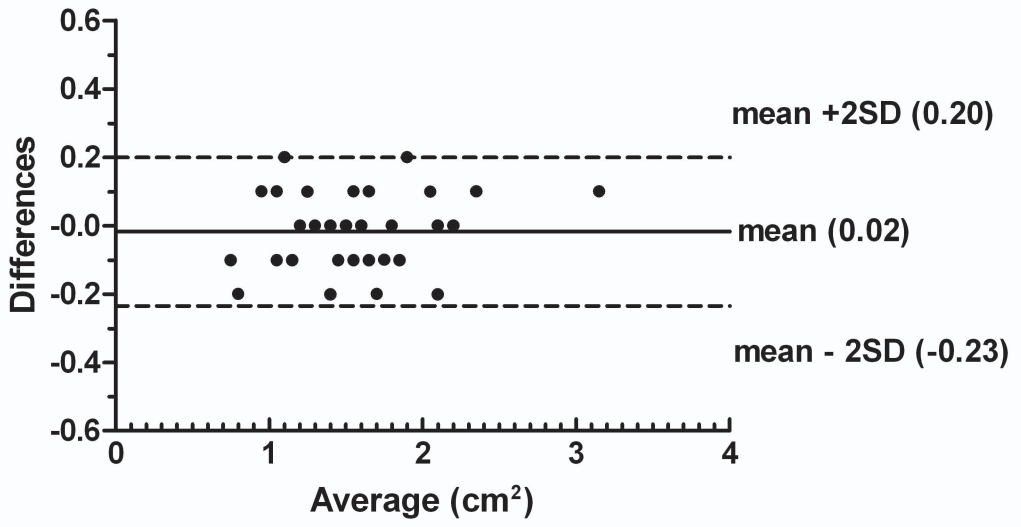

# C Subvalvular Splitting Area

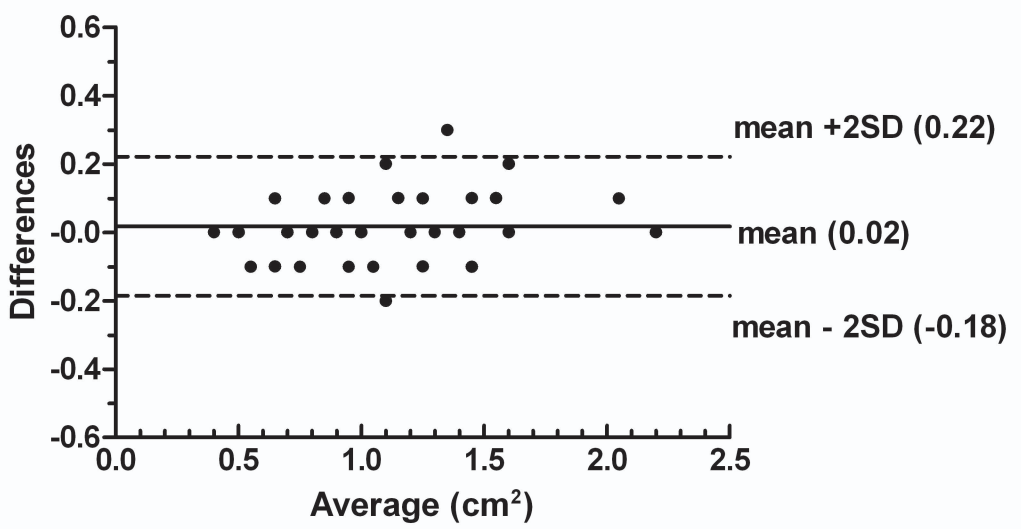

Supplement: MOESM7 [file 9556398]
